# Supplementary material
Source: Springer Nature journal article supplement (https://www.springermedizin.de/resource/supplementary/12947_2010_314_MOESM1_ESM.pdf/9556810)

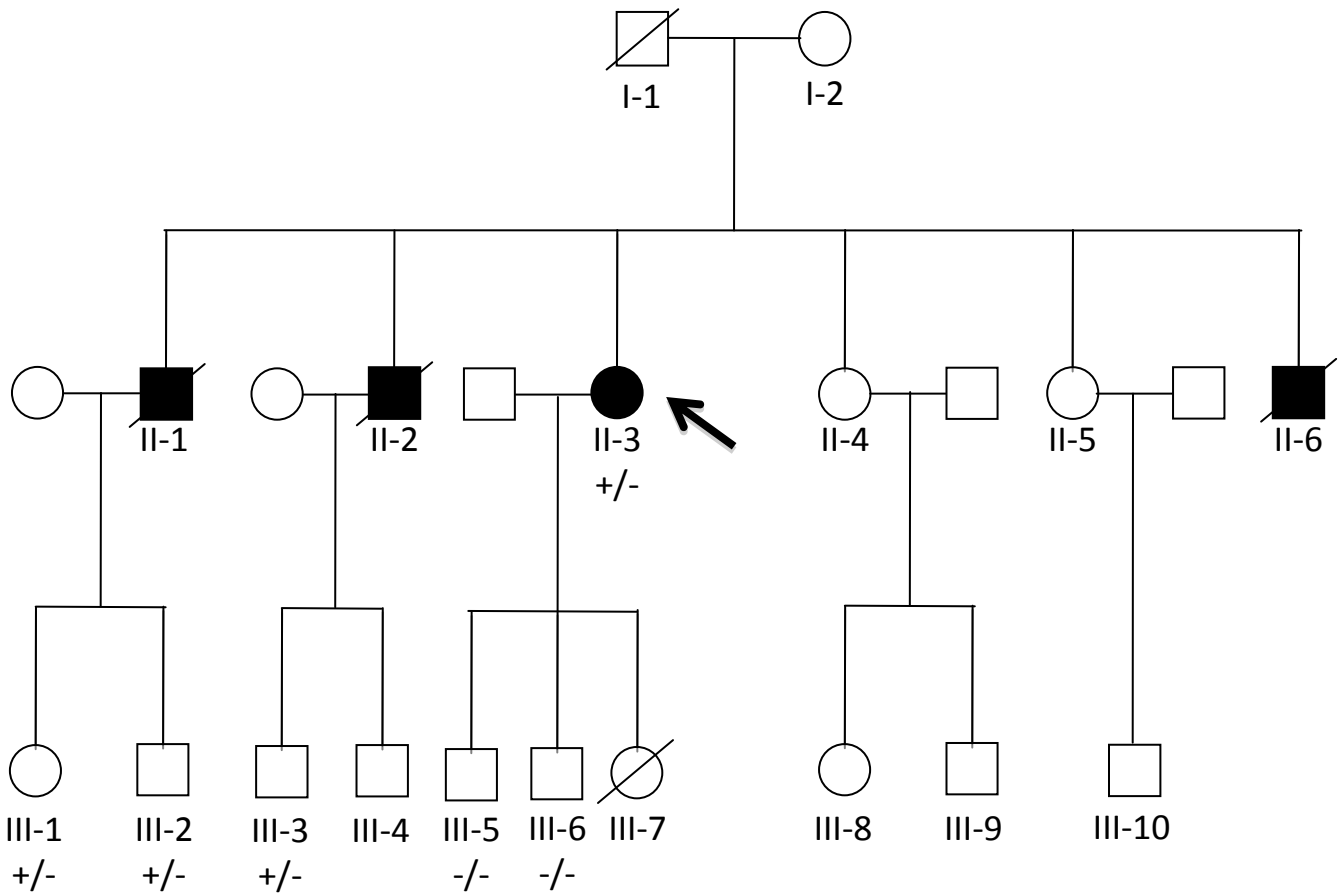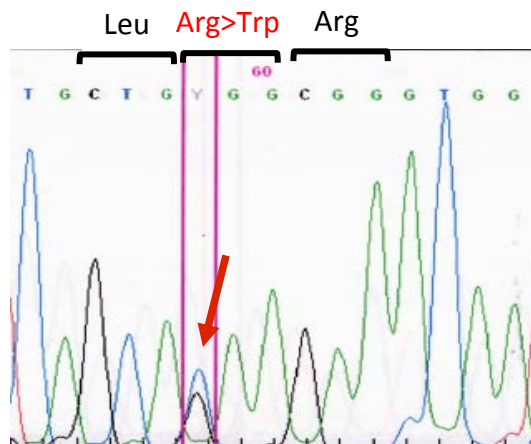

Supplement: MOESM1 [file 9556810]
